# Supplementary material for: Dual Action of Sulfated Hyaluronan on Angiogenic Processes in Relation to Vascular Endothelial Growth Factor-A
Source: PubMed Central journal article supplement (PMC6889296; doi:10.1038/s41598-019-54211-0), 2019-12-02
Supplement: 41598_2019_54211_MOESM1_ESM.pdf [file 41598_2019_54211_MOESM1_ESM.pdf]

# Supplementary Information

*Scientific Reports*

## **Dual Action of Sulfated Hyaluronan on Angiogenic Processes in Relation to Vascular Endothelial Growth Factor-A**

*Linda Koehler<sup>1#</sup>, Gloria Ruiz-Gómez<sup>2#</sup>, Kanagasabai Balamurugan<sup>2</sup>, Sandra Rother<sup>1</sup>, Joanna Freyse<sup>3</sup>, Stephanie Möller<sup>4</sup>, Matthias Schnabelrauch<sup>4</sup>, Sebastian Köhling<sup>3</sup>, Snezana Djordjevic<sup>5</sup>, Dieter Scharnweber<sup>1</sup>, Jörg Rademann<sup>3</sup>, M. Teresa Pisabarro<sup>2\*</sup>, Vera Hintze<sup>1\*</sup>*

<sup>1</sup> Institute of Materials Science, Max Bergmann Center of Biomaterials, TU Dresden, Budapester Straße 27, 01069 Dresden, Germany

<sup>2</sup> Structural Bioinformatics, BIOTEC TU Dresden, Tatzberg 47-51, 01307 Dresden, Germany

<sup>3</sup> Institute of Pharmacy, Freie Universität Berlin, Königin-Luise-Straße 2+4, 14195 Berlin, Germany

<sup>4</sup> Biomaterials Department, INNOVENT e.V., Prüssingstraße 27 B, 07745 Jena, Germany

<sup>5</sup> Institute of Structural and Molecular Biology, University College London, Gower Street, Darwin Building, WC1E 6BT London, United Kingdom

# Equal contribution

\* Corresponding authors

E-mail address: Maria\_Teresa.Pisabarro@tu-dresden.de, +49 351 463 40071 (M. T. Pisabarro)

E-mail address: Vera.Hintze@tu-dresden.de, Tel.: +49 351 463 39389 (V. Hintze)

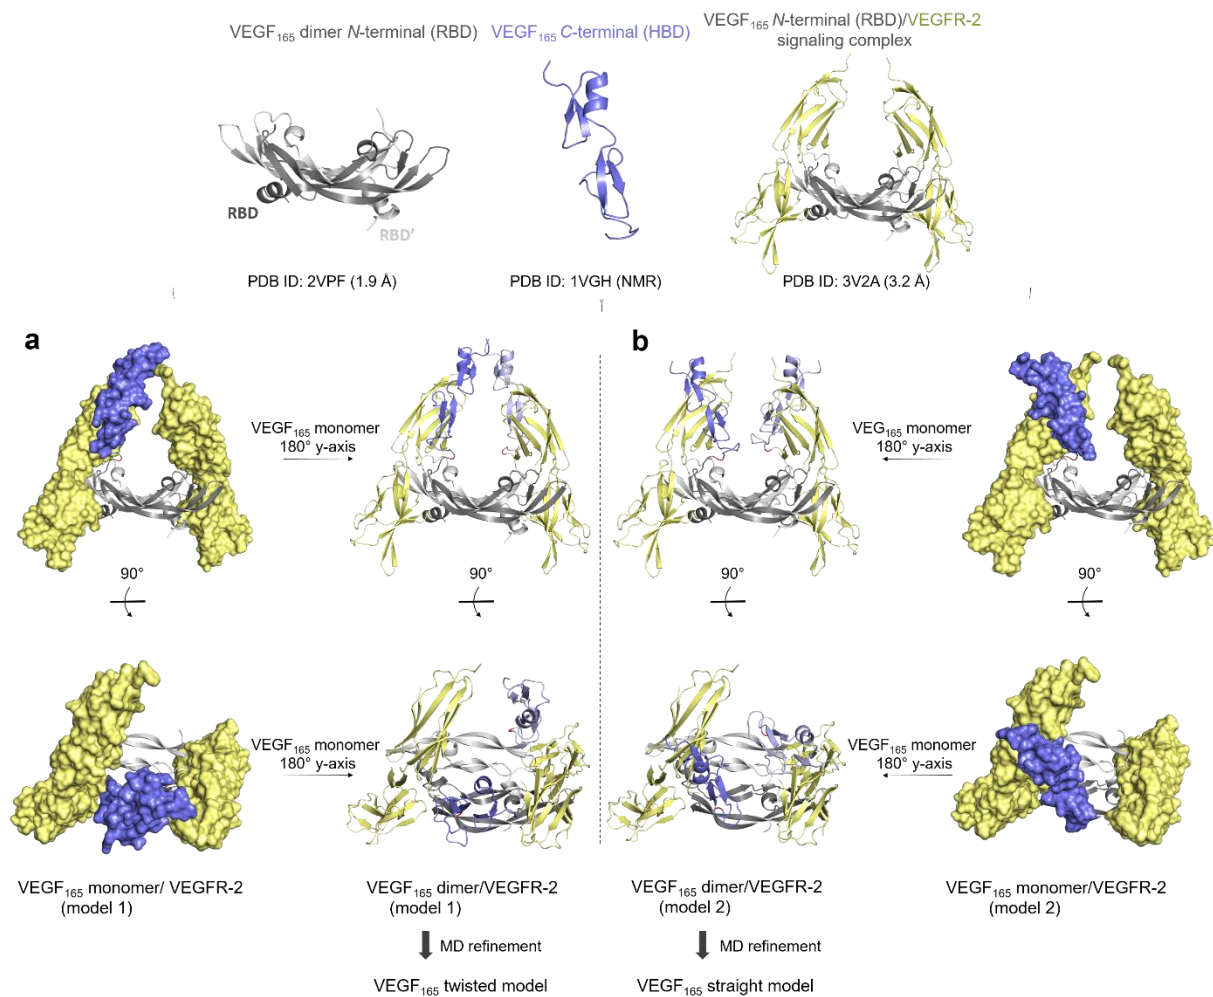

**Fig. S1** Protocol for the Modelling of VEGF<sub>165</sub> dimer. Top: available experimental structures of N-terminal of VEGF<sub>165</sub> (receptor binding domain (RBD)), C-terminal (heparin binding domain (HBD)) and VEGF<sub>165</sub> dimer/VEGFR-2 signaling complex. Bottom: VEGF<sub>165</sub> models built in complex with VEGFR-2. VEGF<sub>165</sub> monomer model 1 (a) and model 2 (b). VEGF<sub>165</sub>-RBD are shown in dark and light grey cartoon for each monomer, the modelled Arg110 connecting RBD and HBD is highlighted in red, HBD<sub>111-114</sub> and HBD<sub>115-165</sub> are in blue cartoon and surface, respectively, and VEGFR-2 in yellow surface and cartoon

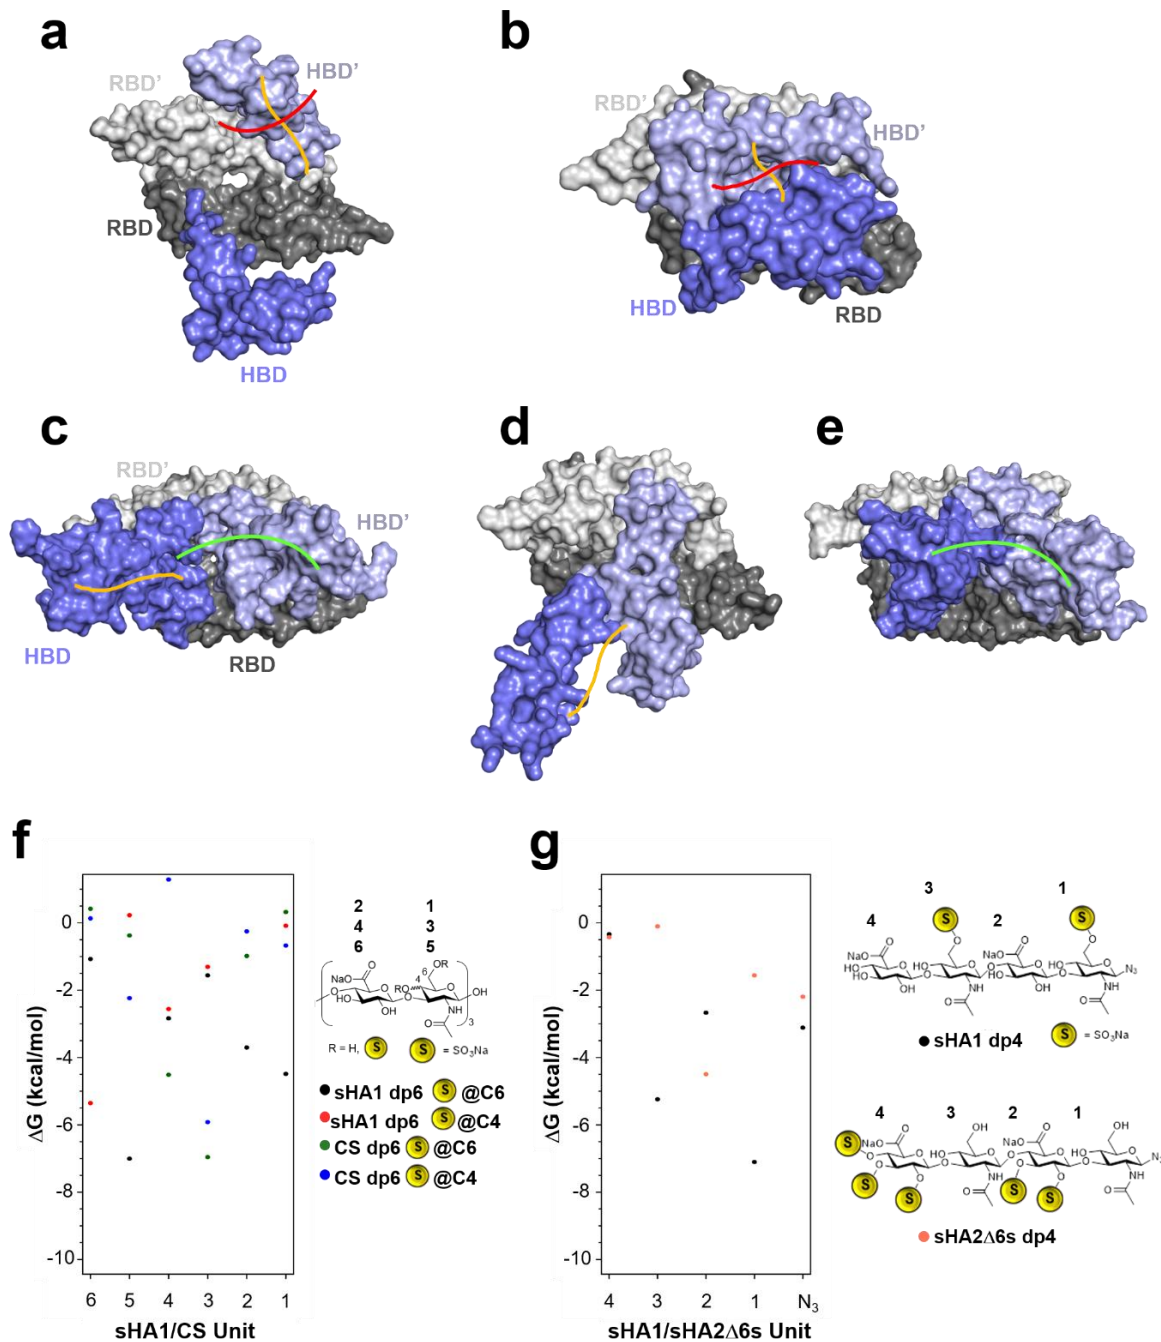

**Fig. S2** Recognition of GAGs by the VEGF<sub>165</sub> dimer. Schematic visualization of different binding modes predicted for VEGF<sub>165</sub> in *twisted* conformation: parallel to HBD (orange) and perpendicular (red) from (a) docking and (b) MD-refined structure; and for the VEGF<sub>165</sub> in *straight* conformation: parallel (orange) and parallel-curved joining two HBDS (green) from (c) docking and (d)-(e) MD-refined structure. VEGF<sub>165</sub> is depicted in surface representation. RBD is highlighted in grey (dark and light representing each monomer), and HBD is highlighted in blue (dark and light representing each monomer). Per-residue binding energy contribution calculated with MM-GBSA from MD simulations of polymeric sulfated GAGs dp6 (f) and oligohyaluronans dp4 (g) in complex with VEGF<sub>165</sub> *twisted* conformation in the HBD-GAG-HBD stacking refined structure

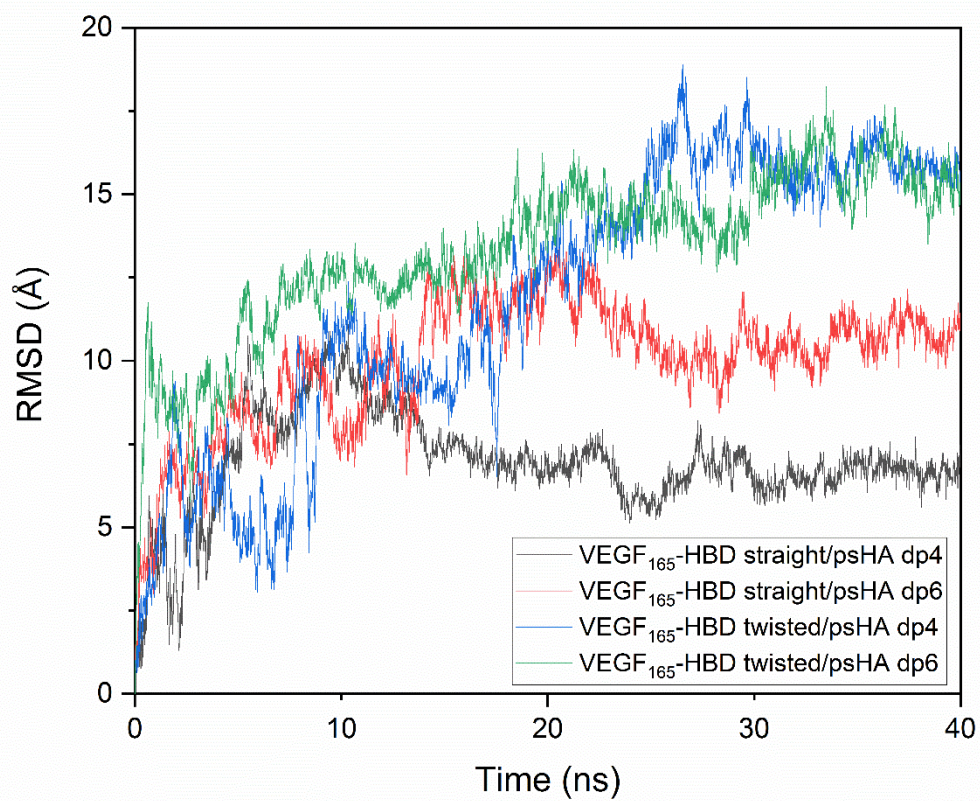

**Fig. S3** RMSD for the psHA dp4 and dp6 interaction with the two VEGF<sub>165</sub>-HBD of the VEGF<sub>165</sub> dimer in *twisted* and *straight* conformations for 40 ns MD simulations

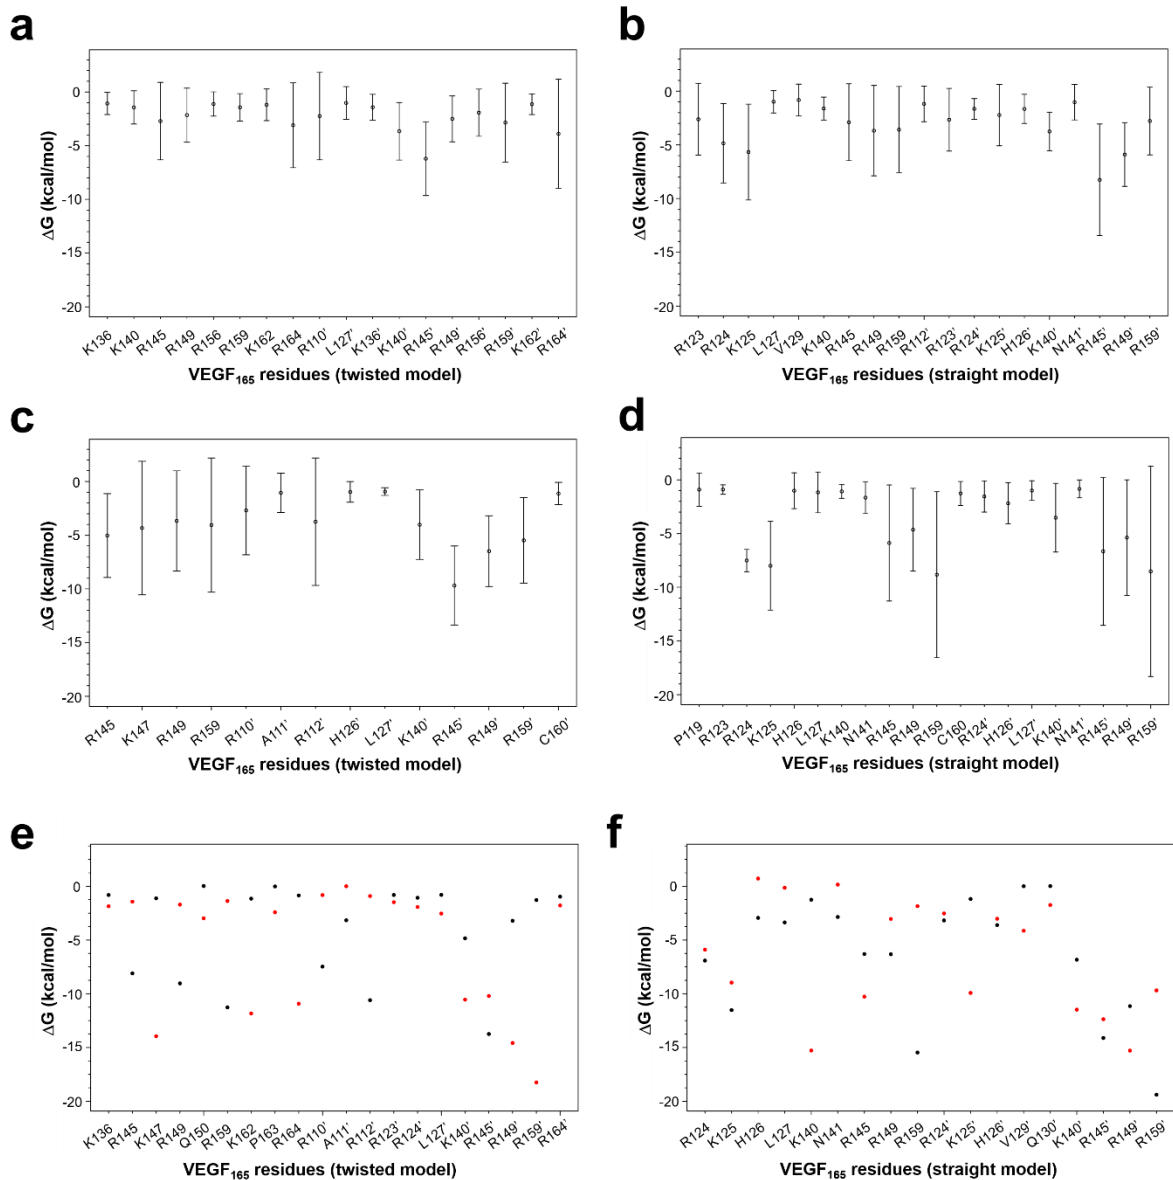

**Fig. S4** Per-residue binding energy contribution calculated with MM-GBSA from MD simulations of VEGF<sub>165</sub> *twisted* and *straight* conformations in complex with polymeric sulfated GAGs dp6 (sHA1, CS, sHA3 and sCS3) (a)-(b), with tetrameric sulfated oligohyaluronans (sHA1, sHA2 $\Delta$ 6 and psHA) (c)-(d) and psHA dp4 (black dots) vs. psHA dp6 (red dots) (e)-(f) in the HBD-GAG-HBD stacking structure. VEGF<sub>165</sub> residues from the second monomer are distinguished by a dash. The errors bars represent the standard error of the mean

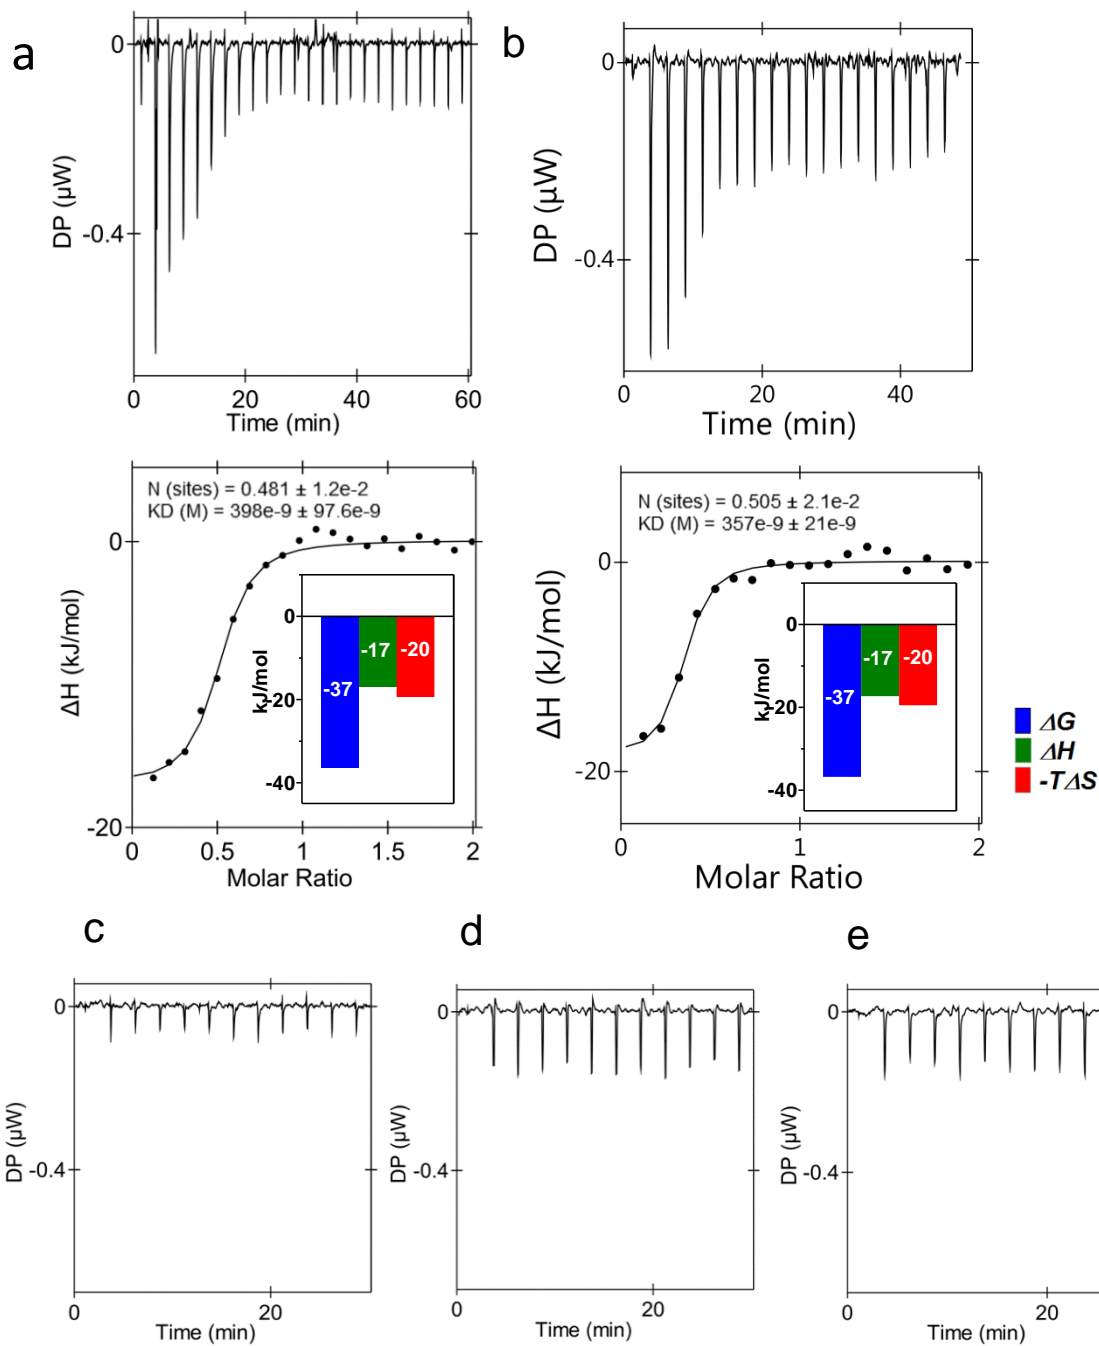

**Fig. S5** Isothermal titration calorimetry data of a 60  $\mu\text{M}$  solution of psHA dp4 titrated to VEGF-HBD (15  $\mu\text{M}$ ) is shown in (a) and (b), (c) buffer to buffer titration, (d) a 60  $\mu\text{M}$  solution of psHA dp4 titrated to buffer, (e) buffer titrated to a 15  $\mu\text{M}$  VEGF-HBD solution ( $n = 2$ )

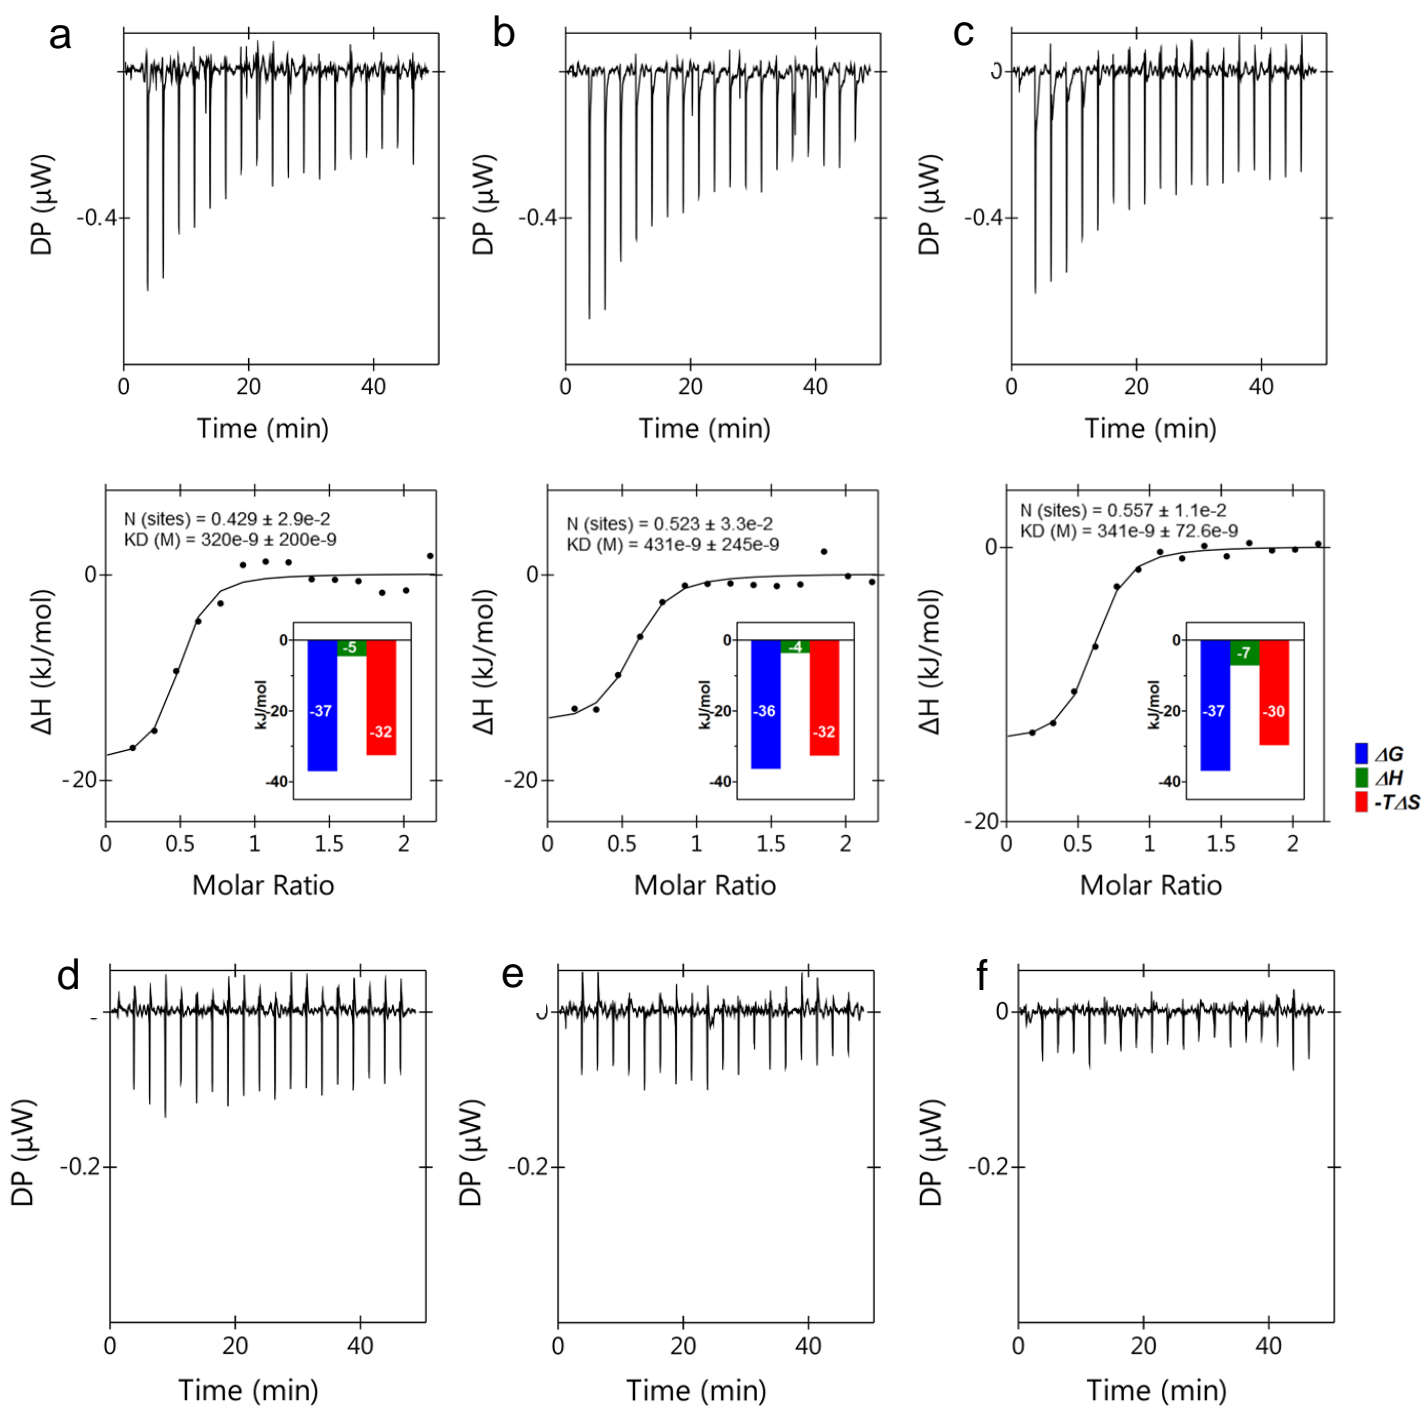

**Fig. S6** Isothermal titration calorimetry data of a 60  $\mu\text{M}$  solution of psHA dp4 titrated to VEGF-HBD (15  $\mu\text{M}$ ) is shown in (a), (b) and (c), (d) buffer to buffer titration, (e) a 60  $\mu\text{M}$  solution of psHA dp4 titrated to buffer, (f) buffer titrated to a 15  $\mu\text{M}$  VEGF-HBD solution ( $n = 3$ )

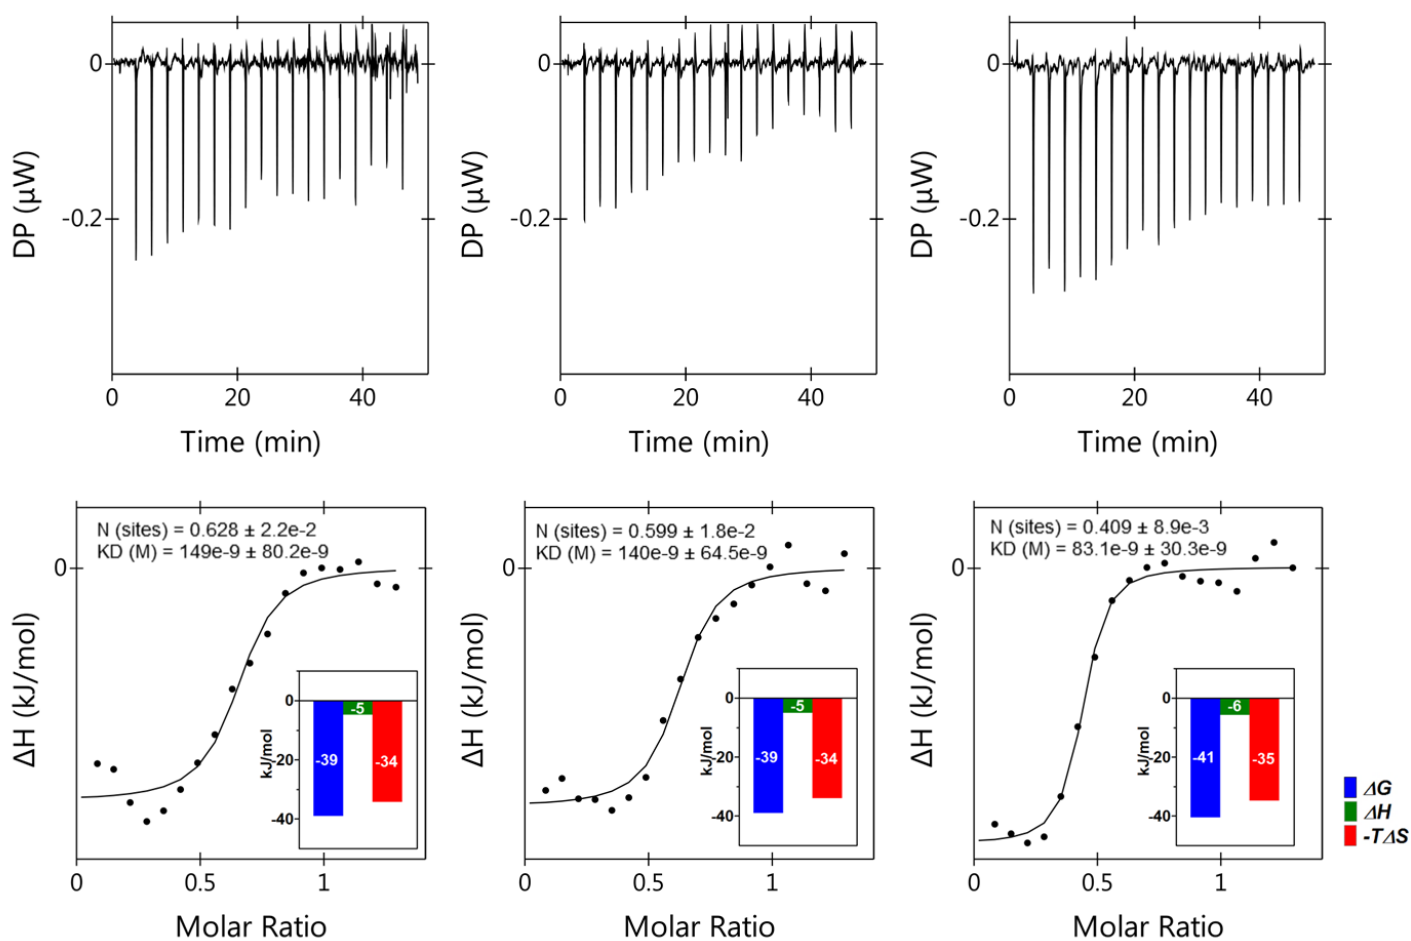

**Fig. S7** Isothermal titration calorimetry data of a 50  $\mu\text{M}$  solution of psHA dp6 titrated to VEGF-HBD (15  $\mu\text{M}$ ) is shown in (a), (b) and (c), ( $n = 3$ )



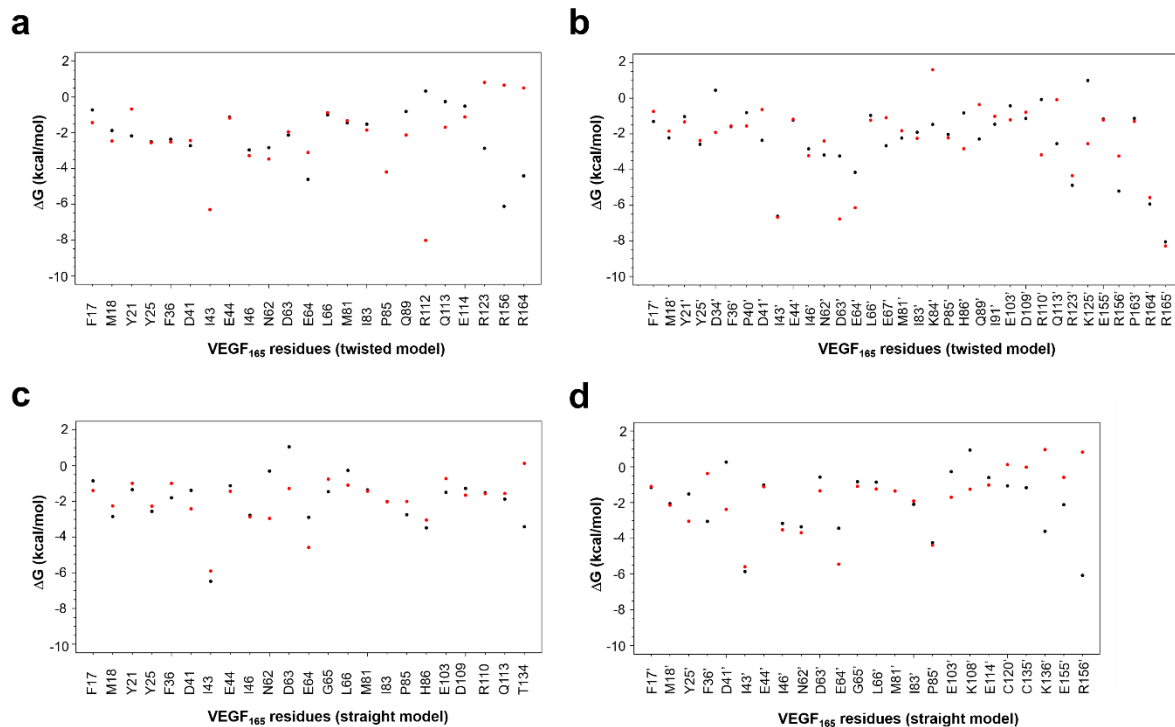

**Fig. S8** Per-residue binding energy contribution calculated with MM-GBSA from MD simulations of VEGF<sub>165</sub> *twisted* (a) and (b), and *straight* (c) and (d) conformations in complex with two molecules of VEGFR-2 in the presence (red dots) and absence (black dots) of SHA3 dp6. VEGF<sub>165</sub> residues from the second monomer in (b) and (d) are distinguished by a dash

**Table S1.** Schematic visualization of different binding sites of GAG derivatives in complex with VEGFR-2 (yellow cartoon) predicted by molecular docking and MM-GBSA binding free energies (left column) and interacting residues determined by per-residue energy decomposition from MD simulations. For illustrative purposes, VEGF<sub>165</sub>-RBD (not taken into account for calculations) is shown in grey transparent cartoon (left column)

| 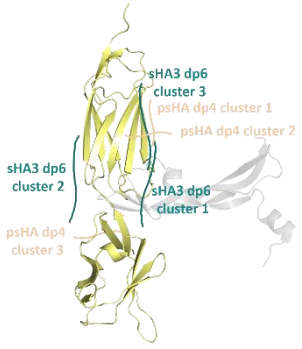 | GAG                                        | VEGFR-2 recognition site                                   | $\Delta G_{\text{GAG-VEGFR-2}}$<br>(kcal/mol) |
|-----------------------------------------------------------------------------------|--------------------------------------------|------------------------------------------------------------|-----------------------------------------------|
|                                                                                   | sHA3 dp6 sulfated at C4,C6,C3' (cluster 1) | K142, R249, R275, K278, T279, Q280, S281, S283, K286, K287 | -22.8 ± 3.2                                   |
|                                                                                   | sHA3 dp6 sulfated at C4,C6,C3' (cluster 2) | K143, R176, R222                                           | -9.9 ± 2.1                                    |
|                                                                                   | sHA3 dp6 sulfated at C4,C6,C3' (cluster 3) | N245, R275, L277, K278, T279, Q280, K286, K287, L289       | -19.0 ± 7.1                                   |
|                                                                                   | psHA dp4 (cluster 1)                       | K271, R275, K278, K286                                     | -2.0 ± 5.9                                    |
|                                                                                   | psHA dp4 (cluster 2)                       | K271, R275, L277, K278, T279, S281, K286, K287, L289       | -43.0 ± 4.4                                   |
|                                                                                   | psHA dp4 (cluster 3)                       | Q132                                                       | -6.5 ± 1.3                                    |
